# Supplementary material for: Rescuing neuronal cell death by RAIDD- and PIDD- derived peptides and its implications for therapeutic intervention in neurodegenerative diseases
Source: PubMed Central journal article supplement (PMC4977500; doi:10.1038/srep31198), 2016-08-09
Supplement: srep31198-s1.pdf [file srep31198-s1.pdf]

**MICROBIOLOGY, BIOCHEMISTRY, STRUCTURAL BIOLOGY**

\*Hyun Ho Park, Phone: +82-53-810-3045. Fax: +82-53-810-4516. E-mail: hyunho@ynu.ac.kr

\*Tae-Jin Lee, Phone: +82-53-640-6914. Fax:+82-53-621-5053. E-mail: tjlee@med.yu.ac.kr

**Rescuing neuronal cell death by RAIDD- and PIDD- derived peptides and its implications for therapeutic intervention in neurodegenerative diseases**

Tae-Ho Jang<sup>a,#</sup>, In-Hye Lim<sup>b,#</sup>, Chang Min Kim<sup>a,#</sup>, Jae Young Choi<sup>a</sup>, Eun-Ae Kim<sup>b</sup>, Tae-Jin Lee<sup>b,\*</sup>  
and Hyun Ho Park<sup>a,\*</sup>

<sup>a</sup>School of Biotechnology and Graduate School of Biochemistry at Yeungnam University, Gyeongsan 38541, South Korea

<sup>b</sup>Department of Anatomy, College of Medicine, Yeungnam University, 317-1 Daemyung-Dong Nam-Gu, Daegu 42415, South Korea

Supplementary Figure S1

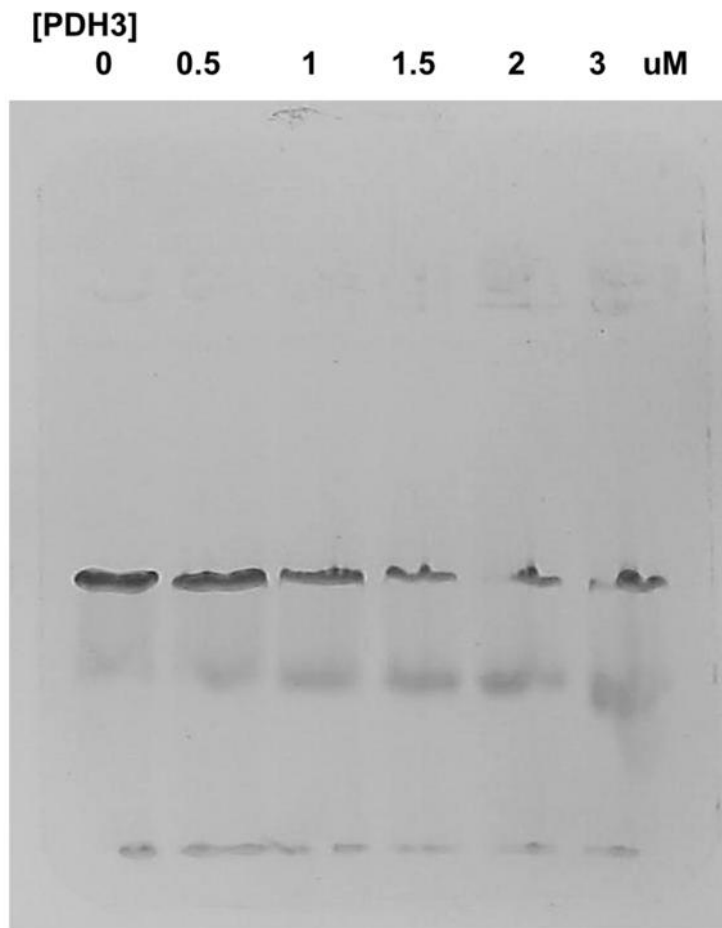

Figure S1. Peptide (PDH3) dose-dependent inhibition of PIDDosome core formation at low concentration range. The RAIDD DD:PIDD DD complex was prepared and mixed with the concentrations of PDH3 peptide indicated above the gel, after which the mixtures were subjected to native-PAGE.
